# Supplementary material
Source: bioRxiv or medRxiv preprint supplement (https://www.biorxiv.org/content/biorxiv/early/2019/05/24/357236/DC1/embed/media-1.pdf)
Supplement: Supplementary file [file media-1.pdf]

## SUPPLEMENTARY FIGURE LEGENDS

### **Supplementary Figure 1. S1PR1 expression in neurons in S1PR1-eGFP knock in mice.**

S1PR1-eGFP fluorescence confocal analysis in the mouse brain. Expression of S1PR1-eGFP in neurons (green channel), and the neuropil. Immunofluorescence for MAP-2 is shown in the red channel. Representative images from hippocampus (dentate gyrus, A), cortex (B) and internal capsula (C, D) are shown. D) Selected region from C. Scale bar 20 $\mu$ m (A-C) or 10 $\mu$ m (D) Representative pictures are shown. N=5-6

### **Supplementary Figure 2. Expression of S1PR1 in cortical microvessels after SAH.**

Western blot analysis for S1PR1 in brain microvessels. 24 and 48 hours after subarachnoid hemorrhage (SAH) cortical microvessels were isolated and S1PR1 levels were detected by western blot ( $n = 4$ ). Immunoblot image (A) and quantification of S1PR1 (B) are shown.  $\beta$ actin bands are used as a loading control and for normalization in quantification. Individual values and mean  $\pm$ SEM are shown.  $**P < 0.01$ , One-way ANOVA followed by Tukey's test.

### **Supplementary Figure 3. Small molecule (3 kDa dextran) BBB leakage upon SAH.**

3-kDa dextran-TMR leakage 24 hours after sham or SAH surgery in  $S1pr1^{flox/flox}$  and  $S1pr1^{iECKO}$  mice. Dextran-TMR dye was circulating for 2 hours.  $N = 7 - 10$ . The individual values and mean  $\pm$  SEM are shown.  $**P < 0.01$ ,  $***P < 0.001$  (One-way ANOVA followed by Tukey's test).  $y$  axis shows relative fluorescence units (R.F.U.) per gram of tissue. Notice that 3KDa TMR-dextran BBB leakage was increased in sham  $S1pr1^{iECKO}$  compared to sham  $S1pr1^{flox/flox}$ , consistent with our recently published studies<sup>45</sup>. 24 hours after SAH, 3KDa TMR-dextran leakage was significantly increased in  $S1pr1^{flox/flox}$  mice compared to sham animals. However, in  $S1pr1^{iECKO}$  mice we did not detect a significant further increase in small molecule (3KDa TMR-dextran) BBB leakage after SAH compared to sham.

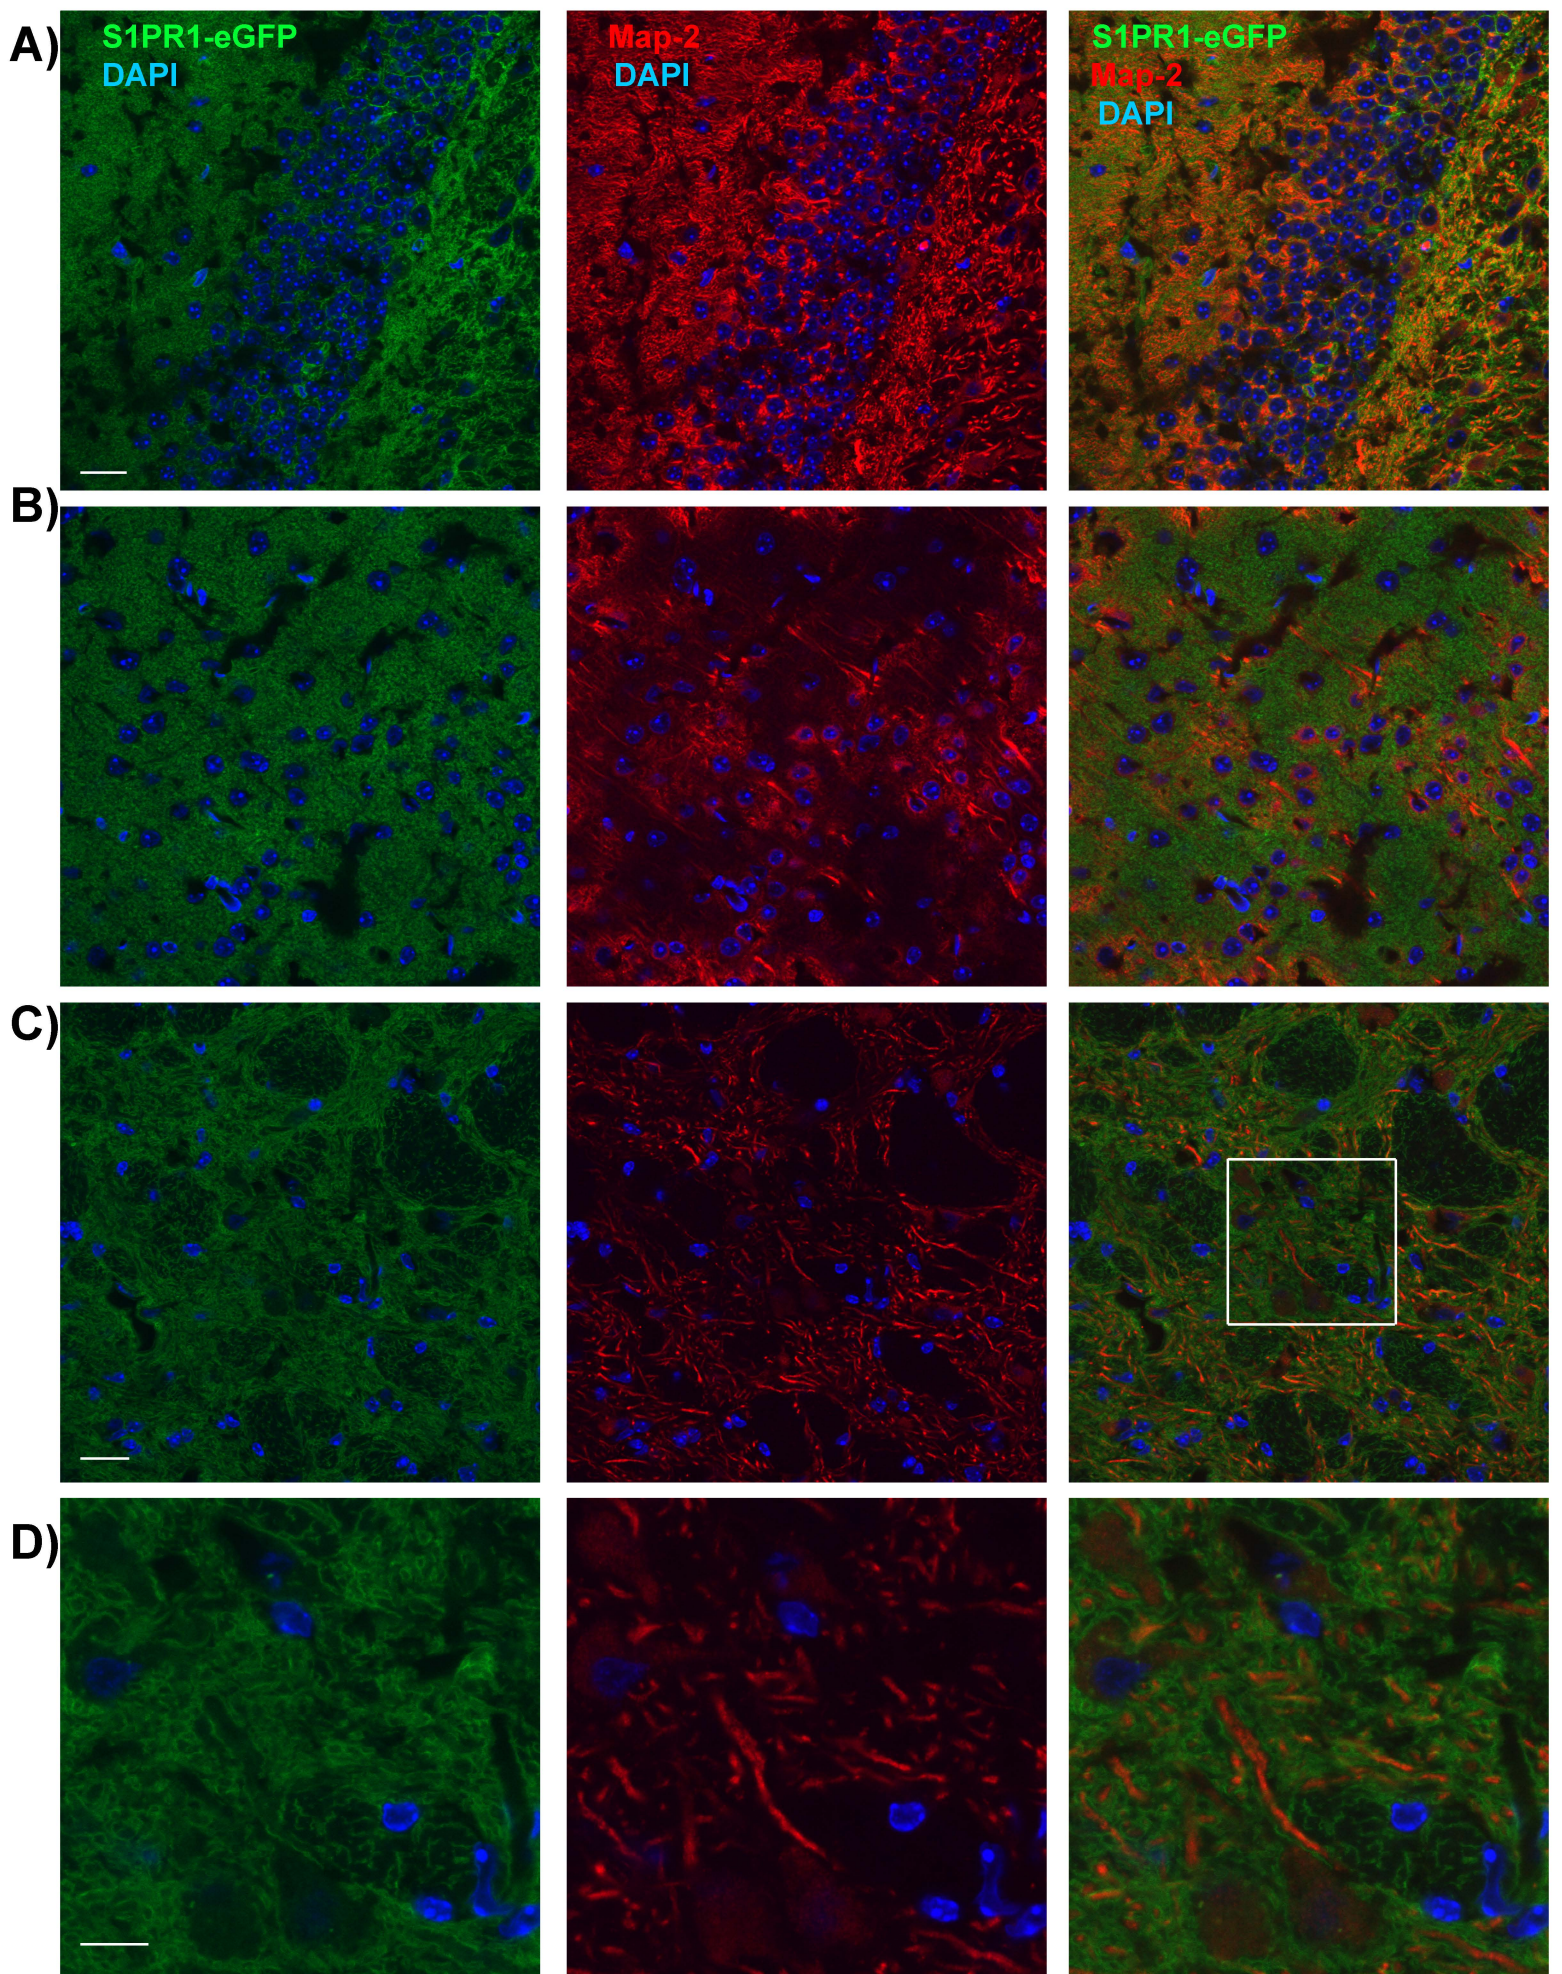

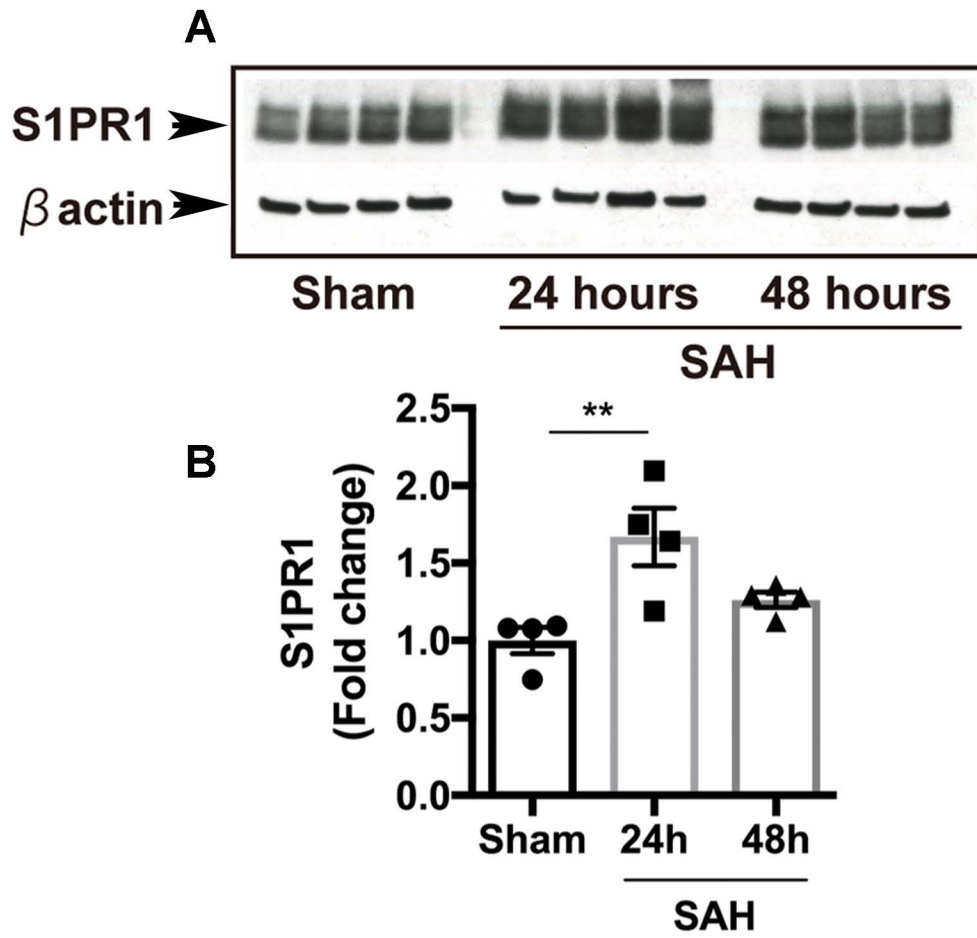

Supplementary Figure 2

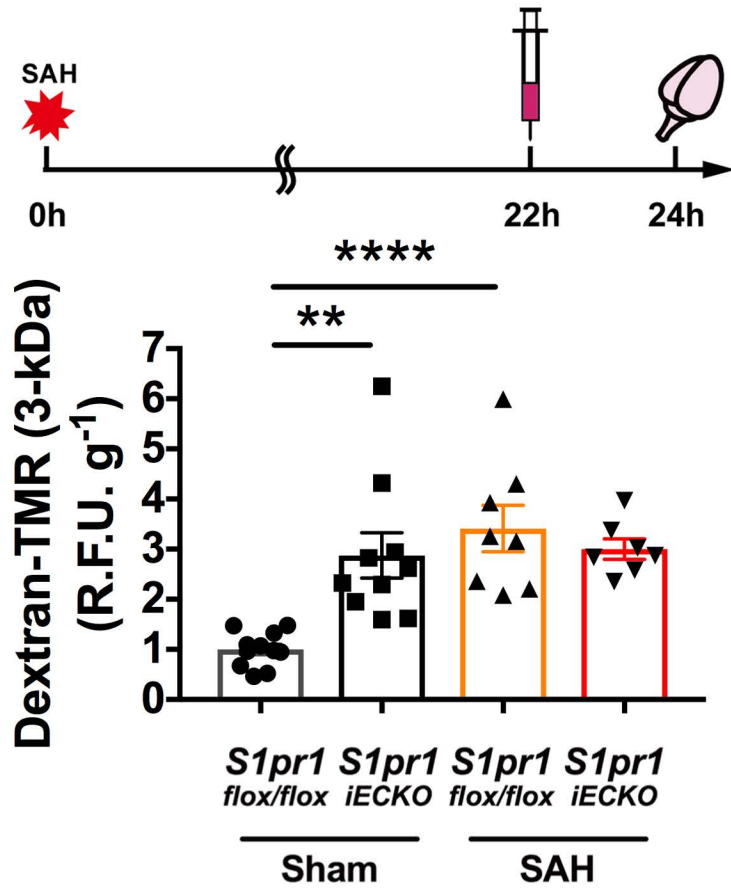

Supplementary Figure 3
